# Supplementary figures and images for: Rheumatic Heart Disease in East Africa: A Systematic Review and Meta-Analysis
Source: Hindawi journal article supplement (doi:10.1155/2023/8834443), 2023-09-19

## Appendix 2: Forest plot of the pooled prevalence of rheumatic heart disease in East Africa

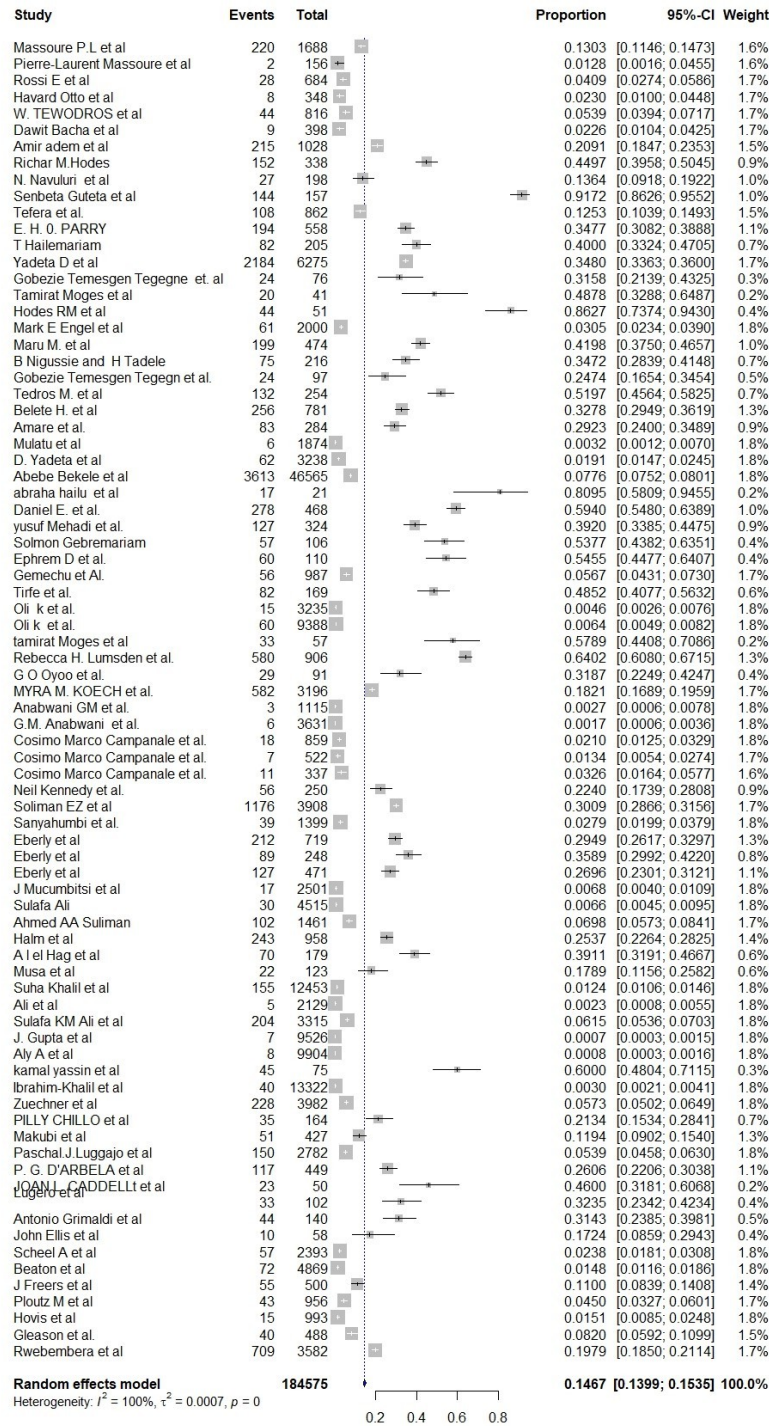

Supplement: f1 [file 8834443.f1.zip]
